# Supplementary material
Source: PubMed Central journal article supplement (PMC5629672)
Supplement: CVI.00231-17_zcd999095526s1.pdf [file CVI.00231-17_zcd999095526s1.pdf]

**Supplemental Table 1: BAMA Env Epitope Sequences**

| <b>gp120 Epitope<sup>1</sup></b> | <b>Antigen<sup>2</sup></b> | <b>Sequence<sup>3</sup></b>                                                   |
|----------------------------------|----------------------------|-------------------------------------------------------------------------------|
| <b>V1V2</b>                      | gp70 B.CaseA2_V1V2/169K    | CIDLRNATNATSNSNTTNTTSSSGGLMMEQGEIKNCSFNITTSIRDKKQKEYALFYKLDIVPIDNPKNSTNYRLISC |
|                                  | gp70 B.CaseA_V1V2          | CIDLRNATNATSNSNTTNTTSSSGGLMMEQGEIKNCSFNITTSIRDKVQKEYALFYKLDIVPIDNPKNSTNYRLISC |
|                                  | gp70 C.1086C_V1V2          | CTNVKGNESDTSEVMKNCSFKATTELKDKKHKVHALFYKLDVVPLNGNSSSSSGEYRLINC                 |
| <b>V2</b>                        | Bio-V2.1086C               | KKKTELKDKKHKVHALFYKLDVVP                                                      |
|                                  | Bio.V2.B                   | KKKTSIRDKVQKEYALFYKLDVVP                                                      |
| <b>V3</b>                        | Bio-V3.C                   | KKKNNTRKSIRIGPGQTFYATGDIIGDIRQAHC                                             |
|                                  | gp70 MNV3/293F             | CTRPNYNKRKRIHIGPGRAFYTTKNIKGTIRQAHC                                           |
|                                  | gp70 ConC_V3tags           | CTRPNNNTRKSIRIGPGQTFYATGDIIGDIRQAHC                                           |
| <b>C1</b>                        | C1                         | KKKMQEDVISLWDQSLKPCVKLTPLCV                                                   |
| <b>C5</b>                        | Bio_RV144_C5.2.B           | KKKSELYKYKVVKIEPLGVAPTKAKRRVVQREKRAV                                          |
|                                  | Bio_RV144_C5.2.C           | KKKSELYKYKVEIKPLGIAPTKAKRRVVEREKRAV                                           |

<sup>1</sup> epitope region of HIV Env gp120 analyzed by BAMA

<sup>2</sup> specific antigens within the specified Env epitope

<sup>3</sup> amino acid sequences of the antigens
