# Supplementary material
Source: PubMed Central journal article supplement (PMC5629672)
Supplement: CVI.00231-17_zcd999095526s2.pdf [file CVI.00231-17_zcd999095526s2.pdf]

**Supplemental Table 2: Signal Intensities determined by Linear Epitope Mapping as a Measure of Env Epitope Recognition**

| Group<br>(Time Point) <sup>1</sup> | Animal<br>No. | Epitope <sup>2</sup><br>C1.1 <sup>3</sup> | C1.2      | C1.3    | V2.1    | V2.2    | C2.1    | C2.2    | V3.1    | V3.2      | V3.3    | C3.1    | C3.2    | V4      | V5-C5   | C5.1    | C5.2    |
|------------------------------------|---------------|-------------------------------------------|-----------|---------|---------|---------|---------|---------|---------|-----------|---------|---------|---------|---------|---------|---------|---------|
| Env Protein<br>(wk.8)              | 45535         | 9,825                                     | 86,228    | 28,732  | 77,626  | 41,668  | 1,438   | 13,125  | 64,746  | 1,027,122 | 24,906  | 15,111  | 1       | 3,433   | 611,589 | 608,782 | 739,721 |
|                                    | 45521         | 64,105                                    | 36,449    | 28,430  | 34,122  | 3,722   | 229,084 | 263     | 241,830 | 1,020,488 | 7,106   | 268,308 | 35,494  | 14,469  | 2,253   | 47,280  | 106,546 |
|                                    | 45519         | 97,980                                    | 166,929   | 41,925  | 22,118  | 393,755 | 1       | 1,443   | 68,487  | 1,024,404 | 2,013   | 5,668   | 7,123   | 21,341  | 1,700   | 1,652   | 27,887  |
|                                    | 45532         | 1,500                                     | 33,718    | 70,091  | 30,273  | 5,840   | 4,364   | 39,944  | 5,248   | 324,459   | 86,635  | 43,909  | 3,760   | 8,742   | 36,384  | 510,802 | 29,236  |
|                                    | 45522         | 3,773                                     | 130,098   | 224     | 418     | 334     | 172     | 2,657   | 57,075  | 275,197   | 2,886   | 2,602   | 213     | 2,623   | 65,794  | 46,657  | 9,337   |
| Co-<br>Administration<br>(wk. 8)   | 45091         | 83,417                                    | 1,047,402 | 206,156 | 111,897 | 546     | 1,185   | 2,636   | 252,180 | 1,047,468 | 174,996 | 5,340   | 1,881   | 838     | 109,865 | 228,011 | 222,257 |
|                                    | 45038         | 363,953                                   | 138,684   | 14,639  | 33,219  | 3,752   | 1,688   | 3,732   | 259     | 1,047,071 | 2,932   | 5,906   | 20,156  | 1,284   | 89,051  | 662,147 | 20,855  |
|                                    | 45069         | 18,083                                    | 14,966    | 2,309   | 587     | 840     | 39,976  | 271     | 209,573 | 1,047,680 | 81,351  | 81,860  | 25,193  | 199     | 94,424  | 316,777 | 455,256 |
|                                    | 45047         | 1,542                                     | 4,810     | 2,078   | 9,518   | 6,477   | 30,036  | 73,263  | 825     | 1,020,093 | 63,808  | 35,784  | 242,662 | 62,012  | 16,775  | 113,616 | 71,901  |
|                                    | 45083         | 132,449                                   | 90,666    | 11,335  | 5,017   | 73      | 86,383  | 6,557   | 196,941 | 1,026,895 | 4,100   | 28,809  | 4,095   | 109     | 24,120  | 49,874  | 38,713  |
| Extended<br>Interval<br>(wk.8)     | 45463         | 10,057                                    | 184,895   | 87,071  | 129,405 | 32,494  | 31,446  | 174,501 | 8,034   | 1,035,675 | 434,481 | 259,890 | 61,735  | 90,490  | 22,064  | 90,874  | 47,646  |
|                                    | 45442         | 1                                         | 3,509     | 24,778  | 5,555   | 1       | 1       | 1       | 30,939  | 1,048,274 | 1       | 1       | 8,009   | 1       | 21,768  | 346,895 | 929,695 |
|                                    | 45448         | 555                                       | 1,020     | 653     | 3,533   | 901     | 43,351  | 989     | 6,952   | 829,785   | 14,167  | 1,232   | 575     | 704     | 39,936  | 396,475 | 483,317 |
|                                    | 45435         | 3,736                                     | 113,394   | 11,808  | 14,704  | 3,054   | 27,306  | 51,731  | 366     | 1,032,417 | 37,706  | 16,568  | 67,273  | 5,233   | 793     | 5,713   | 1       |
|                                    | 45441         | 1                                         | 871       | 317     | 2,362   | 2,548   | 89      | 10,435  | 11,467  | 768,309   | 6,570   | 5,124   | 17,474  | 1,538   | 1       | 1,094   | 2,018   |
| Extended<br>Interval<br>(wk.15)    | 45463         | 22,557                                    | 195,122   | 62,087  | 61,622  | 46,498  | 12,295  | 99,430  | 12,061  | 1,037,139 | 214,176 | 123,475 | 11,440  | 48,685  | 115     | 39,758  | 23,037  |
|                                    | 45442         | 10,145                                    | 74,005    | 5,979   | 732     | 1       | 1       | 1       | 26,331  | 1,048,262 | 25,473  | 2,758   | 28      | 79,801  | 1,288   | 452,684 | 798,680 |
|                                    | 45448         | 406                                       | 16,730    | 3,011   | 409     | 2,033   | 68,853  | 1,024   | 43,129  | 836,977   | 1,336   | 1,481   | 334     | 110,849 | 7,911   | 345,545 | 341,855 |
|                                    | 45435         | 6,151                                     | 524,430   | 76,026  | 38,922  | 14,563  | 11,672  | 9,244   | 1       | 1,034,633 | 4,013   | 337     | 59,030  | 1       | 1       | 15,138  | 300,774 |
|                                    | 45441         | 107                                       | 115,340   | 583     | 1,540   | 12      | 10,065  | 1,306   | 174,228 | 930,460   | 1,106   | 563     | 67,168  | 32,057  | 1,112   | 2,164   | 64,918  |

<sup>1</sup> week 8 corresponds to the time 2 wks after the last immunization in the Env Protein and Co-administration Groups; wks 8 and 15 in the Extended Interval Group correspond to 2 wks after the 2<sup>nd</sup> and 3 wks after the 3 immunization, respectively

<sup>2</sup> the numeric values correspond to the signal intensities measured by linear epitope mapping as explained in the Materials and Methods; values are corrected for binding/ signal intensities at wk 0 (preimmune time point)

<sup>3</sup> the first capital letter combined with the first number describe the epitope region on gp120; if various epitopes for the same region were available, these are indicated by the number after the period: e.g. C1.1, C1.2, and C1.3 correspond to 3 different linear epitopes in the first constant region C1

| Color Legend | Signal Intensity                   |
|--------------|------------------------------------|
|              | 1                                  |
|              | 10 <sup>1</sup> to 10 <sup>2</sup> |
|              | 10 <sup>2</sup> to 10 <sup>3</sup> |
|              | 10 <sup>3</sup> to 10 <sup>4</sup> |
|              | 10 <sup>4</sup> to 10 <sup>5</sup> |
|              | 10 <sup>5</sup> to 10 <sup>6</sup> |
|              | >10 <sup>6</sup>                   |
