# Supplementary material
Source: PubMed Central journal article supplement (PMC5629672)
Supplement: CVI.00231-17_zcd999095526s3.pdf [file CVI.00231-17_zcd999095526s3.pdf]

**Supplemental Table 3: Tier 1 Neutralizing Antibody Titers**

| Date     | HIV Neutralization Assay in TZM-bl Cells: MW965 (Tier 1, Clade C) ID <sub>50</sub> <sup>1</sup> |       |       |       |       |              |       |       |       |       |                   |       |       |       |       |                   |       |       |       |       | Date     |
|----------|-------------------------------------------------------------------------------------------------|-------|-------|-------|-------|--------------|-------|-------|-------|-------|-------------------|-------|-------|-------|-------|-------------------|-------|-------|-------|-------|----------|
|          | Env Protein                                                                                     |       |       |       |       | Prime/ Boost |       |       |       |       | Co-Administration |       |       |       |       | Extended Interval |       |       |       |       |          |
|          | 45519                                                                                           | 45521 | 45522 | 45532 | 45535 | 45035        | 45042 | 45054 | 45081 | 45082 | 45038             | 45047 | 45069 | 45083 | 45091 | 45435             | 45441 | 45442 | 45448 | 45463 |          |
| Wk 0     | 21 <sup>2</sup>                                                                                 | 22    | <20   | 24    | 30    | <20          | <20   | <20   | <20   | <20   | <20               | <20   | <20   | <20   | <20   | 27                | 21    | <20   | <20   | <20   | Wk 0     |
| Wk 6     | 384                                                                                             | 57    | 1370  | 216   | 63    | <20          | <20   | <20   | <20   | <20   | 118               | 345   | 51    | 359   | <20   | <20               | <20   | 30    | 23    | 27    | Wk 6     |
| Wk 8     | 1948                                                                                            | 1061  | 1198  | 412   | 659   | 205          | 548   | 29    | 112   | 90    | 829               | 163   | 279   | 1517  | 393   | 135               | 41    | 1305  | 136   | 866   | Wk 8     |
| Wk 10    | 1350                                                                                            | 1126  | 598   | 294   | 1593  | 248          | 295   | <20   | 92    | 138   | 714               | 89    | 129   | 673   | 147   | 87                | 57    | 1761  | 106   | 173   | Wk 10    |
| Wk 12    | 1278                                                                                            | 1133  | 564   | 306   | 2483  | 318          | 226   | 29    | 85    | 218   | 314               | 425   | 107   | 60    | 58    | 79                | 41    | 905   | 81    | 128   | Wk 12    |
| Wk 14/15 |                                                                                                 |       |       |       |       | 331          | 128   | 47    | 89    | 333   | 233               | 159   | 121   | 381   | 37    | 765               | 1333  | 2672  | 1318  | 2568  | Wk 14/15 |
| Wk 16    |                                                                                                 |       |       |       |       |              |       |       |       |       |                   |       |       |       |       | 364               | 734   | 2005  | 1005  | 1990  | Wk 16    |
| Wk 19/20 | 637                                                                                             | 849   | 251   | 229   | 1524  |              |       |       |       |       |                   |       |       |       |       | 150               | 244   | 616   | 457   | 976   | Wk 19/20 |
| Wk 24    |                                                                                                 |       |       |       |       |              |       |       |       |       |                   |       |       |       |       | 162               | 150   | 290   | 355   | 788   | Wk 24    |
| Wk 28    |                                                                                                 |       |       |       |       |              |       |       |       |       |                   |       |       |       |       | 108               | 129   | 294   | 294   | 492   | Wk 28    |
| Wk 32    |                                                                                                 |       |       |       |       |              |       |       |       |       |                   |       |       |       |       | 84                | 93    | 158   | 305   | 383   | Wk 32    |
| Wk 35    |                                                                                                 |       |       |       |       |              |       |       |       |       |                   |       |       |       |       | 924               | 432   | 310   | 1252  | 1519  | Wk 35    |

| ID <sub>50</sub> |
|------------------|
| <20              |
| 20-100           |
| 101-200          |
| 201-400          |
| >400             |

<sup>1</sup> The table list the Tier 1 plasma neutralizing titer against the clade C virus MW695 for each animal at each time point in each group. Titers were determined in TZM-bl cells. The 50% inhibitory dose (ID<sub>50</sub>) was calculated as the plasma dilution or antibody concentration that caused a 50% reduction in relative light units (RLU) compared to the virus control wells after subtraction of cell control RLU. The pre-immunization time point (week 0) was used to measure background levels of neutralization.

<sup>2</sup> The legend for the color coding of neutralization titers is shown below the table.
